# Supplementary material
Source: PubMed Central journal article supplement (PMC8058432)
Supplement: mmc1.pdf [file mmc1.pdf]

## **Supplemental Information**

### **Microglial vesicles improve post-stroke recovery by preventing immune cell senescence and favoring oligodendrogenesis**

**Stefano Raffaele, Paolo Gelosa, Elisabetta Bonfanti, Marta Lombardi, Laura Castiglioni, Mauro Cimino, Luigi Sironi, Maria P. Abbraccio, Claudia Verderio, and Marta Fumagalli**

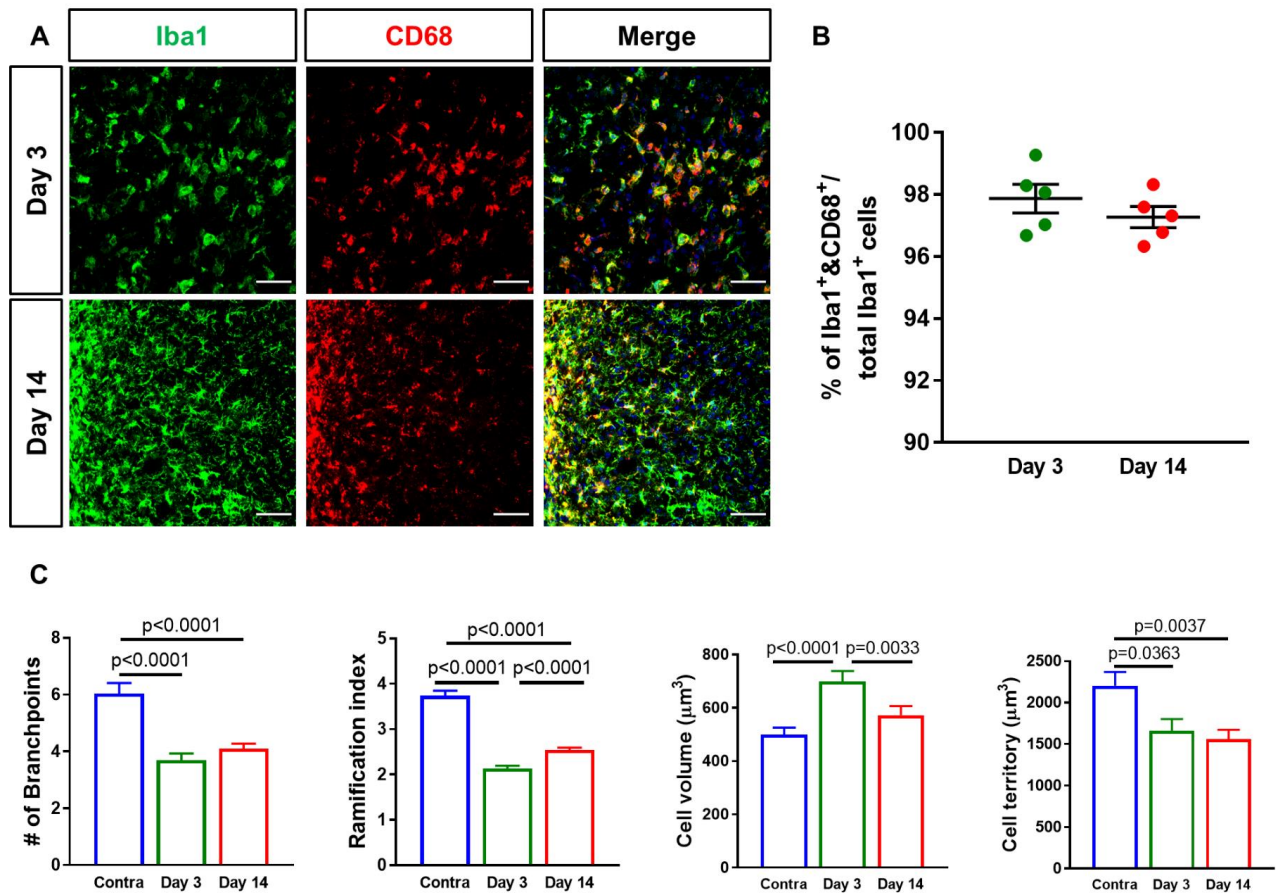

**Figure S1. Iba1<sup>+</sup> cells in the peri-infarct area express the scavenger receptor CD68 and undergo progressive morphological changes.** (A) Representative images of Iba1<sup>+</sup>&CD68<sup>+</sup> cells at the boundary of ischemic lesion (0-500  $\mu\text{m}$ ) at day 3 and 14 after MCAo. Scale bar: 50  $\mu\text{m}$ . (B) Quantification of the percentage of Iba1<sup>+</sup> cells co-expressing the scavenger receptor CD68 at the boundary of ischemic lesion (0-500  $\mu\text{m}$ ) at day 3 and 14 post-MCAo (n=5). Data are expressed as mean  $\pm$  SE. (C) Quantification of Iba1<sup>+</sup> cells number of branchpoints, ramification index, cell volume and cell territory at the boundary of ischemic lesion (0-500  $\mu\text{m}$ ) at day 3 and day 14 post-MCAo and in the corresponding region of the contralateral hemisphere at day 1 post-MCAo (130-150 cells from 3 animals/experimental condition have been analyzed). Data are expressed as mean  $\pm$  SE. Kruskal-Wallis test followed by Dunn's post-hoc analysis.

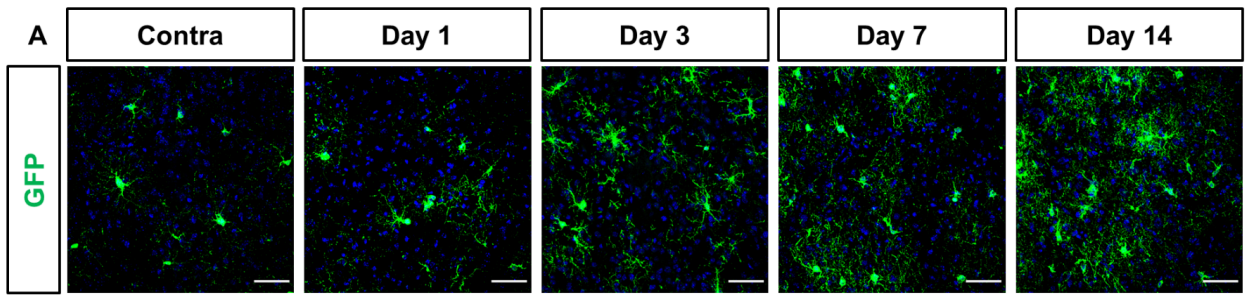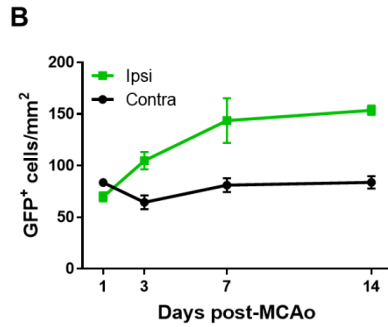

| Ipsi vs Contra | p value | Days (ipsi) | p value |
|----------------|---------|-------------|---------|
| Day 1          | ns      | 1 vs 3      | ns      |
| Day 3          | 0.0316  | 1 vs 7      | 0.0002  |
| Day 7          | 0.0010  | 1 vs 14     | <0.0001 |
| Day 14         | 0.0003  | 3 vs 7      | 0.0459  |
|                |         | 3 vs 14     | 0.0103  |
|                |         | 7 vs 14     | ns      |

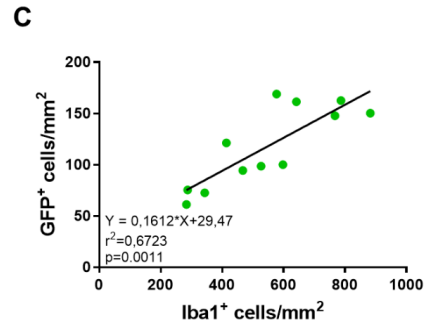

**Figure S2. GFP<sup>+</sup> OPC density at injury borders increases over time after cerebral ischemia in parallel with microglia/macrophage activation.** **(A)** Representative images of GFP<sup>+</sup> OPCs at the boundary of ischemic lesion (0-500  $\mu$ m) at day 1, 3, 7 and 14 after MCAo and in the corresponding region of the contralateral hemisphere at day 1 post-MCAo. Scale bar: 50  $\mu$ m. **(B)** Quantification of the density of GFP<sup>+</sup> OPCs at the boundary of ischemic lesion (0-500  $\mu$ m) and in the corresponding region of the contralateral hemisphere at day 1, 3, 7 and 14 after MCAo (n=3). Data are expressed as mean  $\pm$  SE. Two-way ANOVA (Interaction p=0.0017, Time p=0.0008, MCAo p<0.0001) followed by Tukey's post-hoc analysis (p values relative to multiple comparisons are reported in the tables). **(C)** Scatter plot representation of the linear correlation between the densities of Iba1<sup>+</sup> cells (x axis) and GFP<sup>+</sup> OPCs (y axis) at the boundary of ischemic lesion (0-500  $\mu$ m) at the different time points analyzed after MCAo. For correlation analysis, two-tailed Pearson test was used.

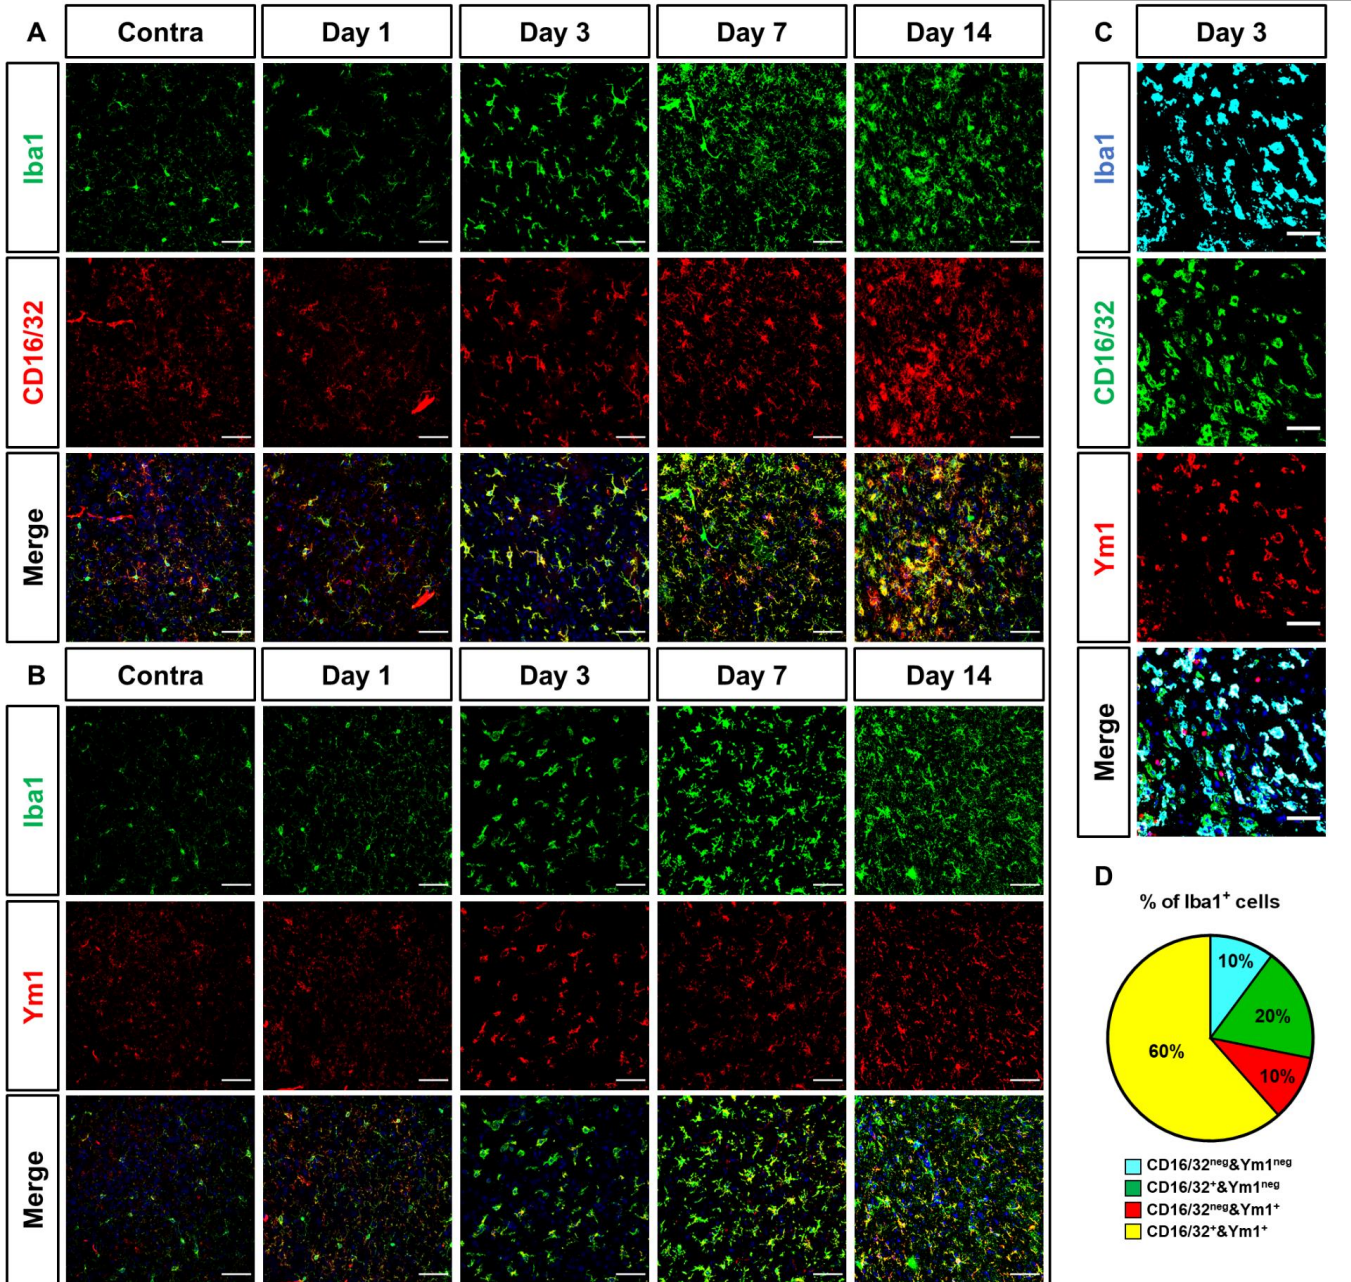

**Figure S3. Characterization of Iba1<sup>+</sup> co-localization with the pro-inflammatory marker CD16/32 or the pro-resolving factor Ym1 in the peri-infarct area.** (A) Representative images of Iba1<sup>+</sup>&CD16/32<sup>+</sup> cells at the boundary of ischemic lesion (0-500  $\mu$ m) at day 1, 3, 7 and 14 after MCAo and in the corresponding region of the contralateral hemisphere at day 1 post-MCAo. Scale bar: 50  $\mu$ m. (B) Representative images of Iba1<sup>+</sup>&Ym1<sup>+</sup> cells at the boundary of ischemic lesion (0-500  $\mu$ m) at day 1, 3, 7 and 14 after MCAo and in the corresponding region of the contralateral hemisphere at day 1 post-MCAo. Scale bar: 50  $\mu$ m. (C) Representative images of triple positive Iba1<sup>+</sup>&CD16/32<sup>+</sup>&Ym1<sup>+</sup> cells at the boundary of ischemic lesion (0-500  $\mu$ m) at day 3 after MCAo. Scale bar: 50  $\mu$ m. (D) Quantification of the percentage of Iba1<sup>+</sup> cells co-expressing CD16/32, Ym1 or both markers at the boundary of ischemic lesion (0-500  $\mu$ m) at day 3 after MCAo.

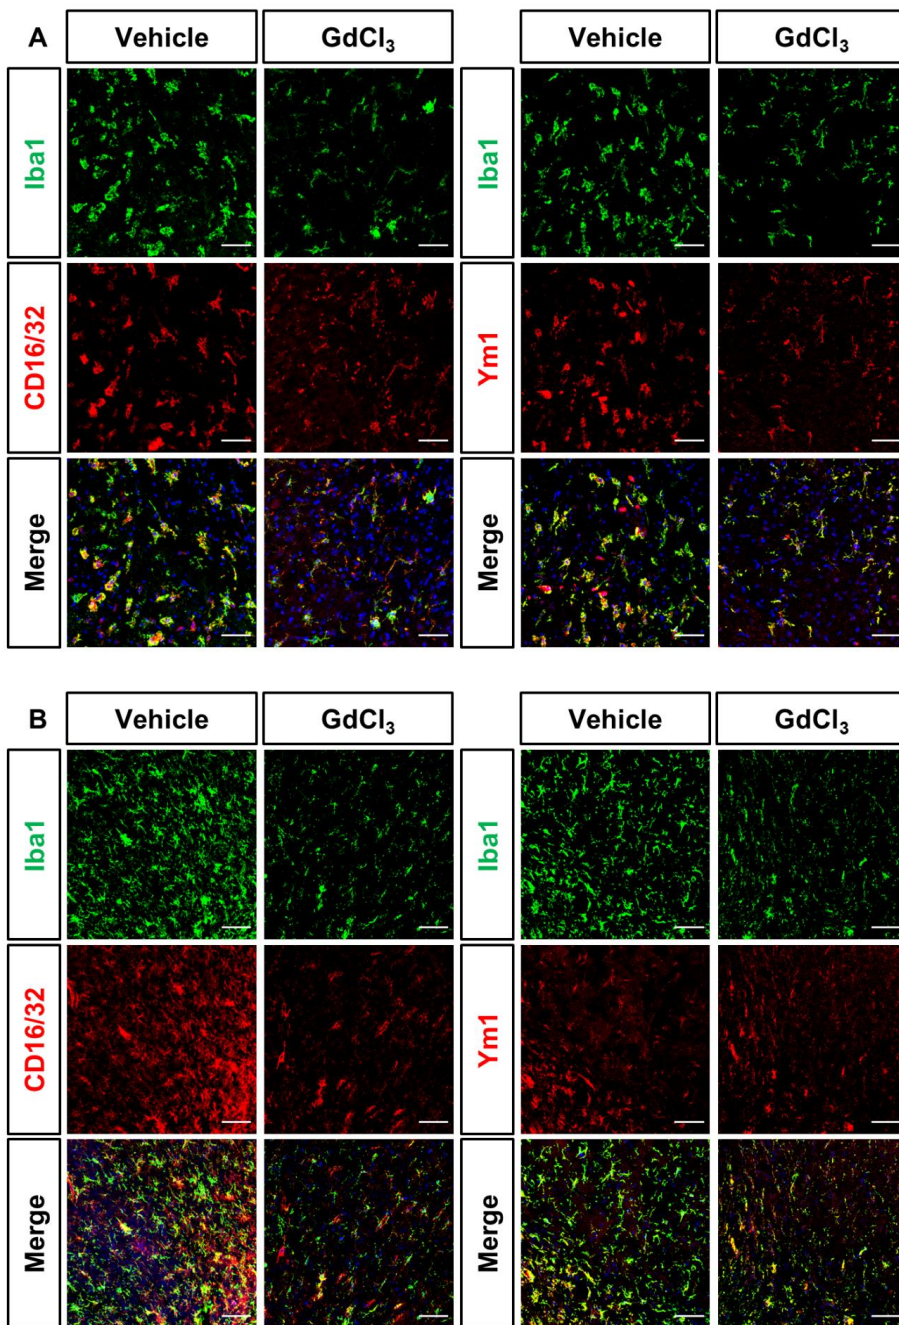

**Figure S4. Characterization of Iba1 co-localization with CD16/32 or Ym1 after microglia/macrophage depletion during the early or late phase after MCAo. (A)** Representative images of Iba1<sup>+</sup>&CD16/32<sup>+</sup> and Iba1<sup>+</sup>&Ym1<sup>+</sup> cells at the boundary of ischemic lesion (0-500  $\mu$ m) at day 3 post-MCAo following intranasal administration of GdCl<sub>3</sub> or vehicle. Scale bar: 50  $\mu$ m. **(B)** Representative images of Iba1<sup>+</sup>&CD16/32<sup>+</sup> and Iba1<sup>+</sup>&Ym1<sup>+</sup> cells at the boundary of ischemic lesion (0-500  $\mu$ m) at day 17 post-MCAo following intranasal administration of GdCl<sub>3</sub> or vehicle. Scale bar: 50  $\mu$ m.

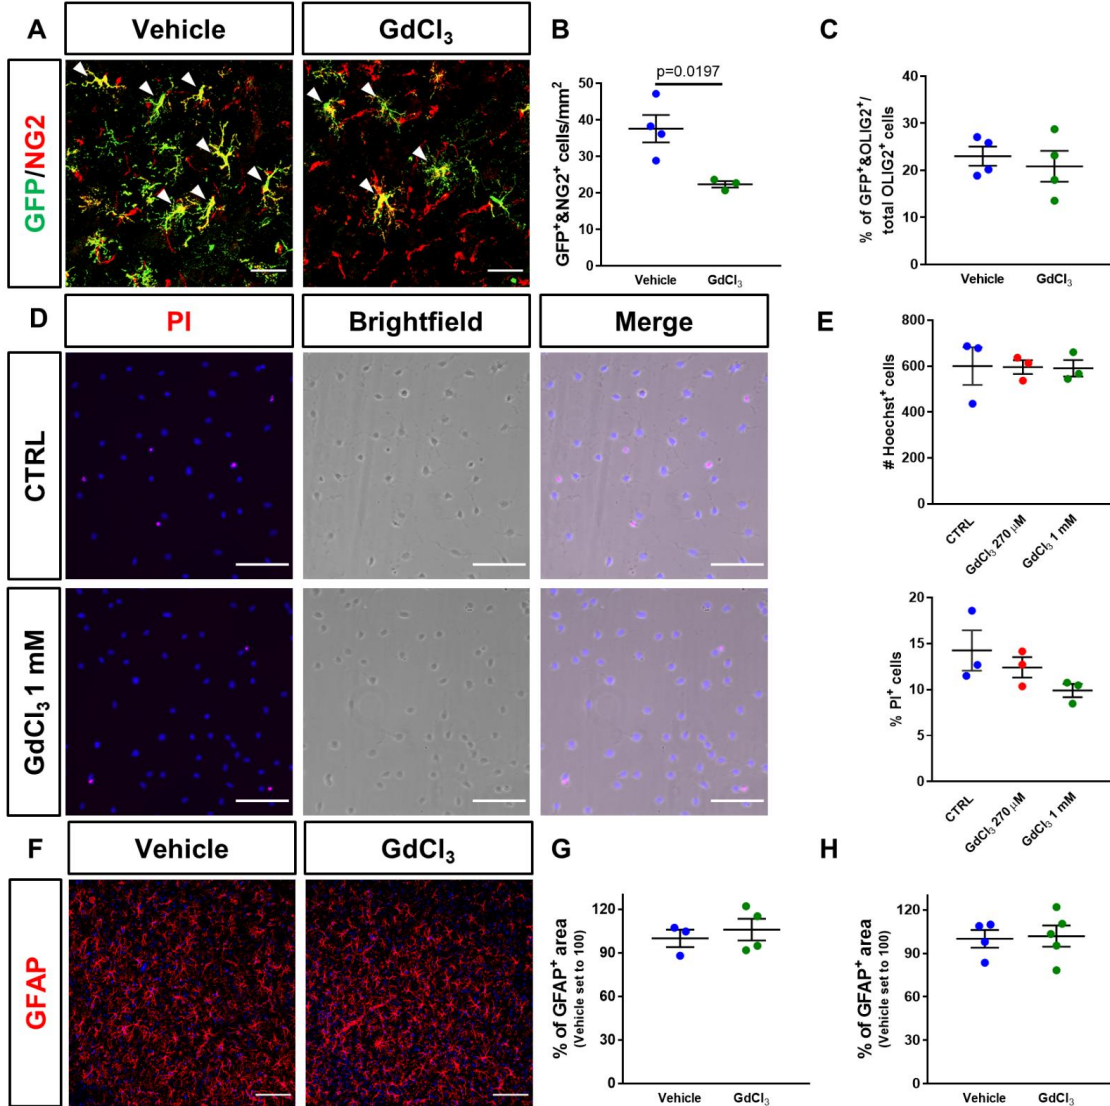

**Figure S5. Microglia reduction by GdCl<sub>3</sub> treatment limits the recruitment of early GFP<sup>+</sup> OPCs expressing NG2 at the boundary of ischemic lesion without exerting toxic effects on primary OPC cultures and on astrogliosis.** (A) Representative images of GFP/NG2 staining at the boundary of ischemic lesion (0-500  $\mu$ m) at day 3 post-MCAo following intranasal administration of GdCl<sub>3</sub> or vehicle. Arrowheads indicate cells co-expressing GFP and NG2. Scale bar: 50  $\mu$ m. (B) Quantification of the density of GFP<sup>+</sup>&NG2<sup>+</sup> cells at the boundary of ischemic lesion at day 3 post-MCAo following intranasal administration of GdCl<sub>3</sub> or vehicle. Data are shown as mean  $\pm$  SE (n=4-3). Student's t-test. (C) Quantification of the percentage of Olig2<sup>+</sup> cells labelled by GFP expression at the boundary of ischemic lesion at day 3 post-MCAo following early intranasal administration of GdCl<sub>3</sub> or vehicle (n=4). Data are expressed as mean  $\pm$  SE. (D) Representative images of primary OPCs incorporating propidium iodide (PI) after treatment with GdCl<sub>3</sub> (1 mM) or medium alone (CTRL). Hoechst33258 was used to label cell nuclei. Scale bar: 50  $\mu$ m. (E) Quantification of the number of Hoechst33258<sup>+</sup> cell nuclei and of the percentage of PI<sup>+</sup> apoptotic cell nuclei in primary OPC cultures exposed to GdCl<sub>3</sub> (270  $\mu$ M or 1 mM) or CTRL. Data are shown as mean  $\pm$  SE (n=3). (F) Representative images of GFAP staining at the boundary of ischemic lesion (0-500  $\mu$ m) at day 3 post-MCAo following intranasal administration of GdCl<sub>3</sub> or vehicle. Scale bar: 100  $\mu$ m. (G) Quantification of the percentage of GFAP<sup>+</sup> area at the boundary of ischemic lesion at day 3 post-MCAo following early intranasal administration of GdCl<sub>3</sub> or vehicle (n=3-4). Data are expressed as mean  $\pm$  SE. (H) Quantification of the percentage of GFAP<sup>+</sup> area at the boundary of ischemic lesion at day 17 post-MCAo following late intranasal administration of GdCl<sub>3</sub> or vehicle (n=4-5). Data are expressed as mean  $\pm$  SE.

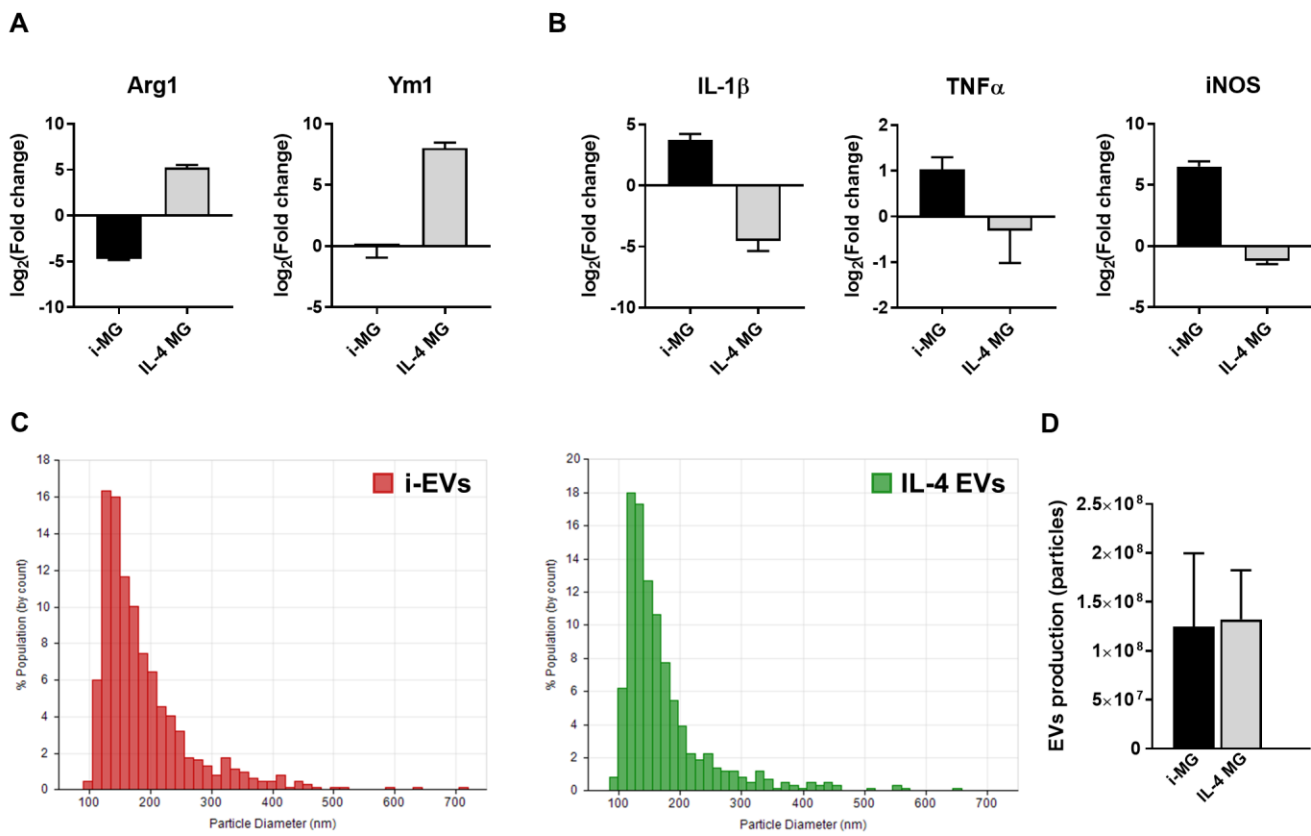

**Figure S6. Characterization of polarization and EV release of murine microglia exposed to pro-inflammatory (i-MG) or pro-regenerative (IL-4 MG) stimuli. (A)** Gene expression of pro-regenerative markers in primary microglia exposed to pro-inflammatory (i-MG) or pro-regenerative (IL-4 MG) stimuli with respect to non-stimulated cells (NS-MG) set to 0. Data are shown as mean  $\pm$  SE. **(B)** Gene expression of pro-inflammatory markers in primary microglia exposed to pro-inflammatory (i-MG) or pro-regenerative (IL-4 MG) stimuli with respect to non-stimulated cells (NS-MG) set to 0. Data are shown as mean  $\pm$  SE. **(C)** Size distribution graphs relative to EVs released by i-MG (i-EVs) and IL-4 MG (IL-4 EVs) upon ATP stimulation. EV size was measured by Tunable Resistive Pulse Sensing (TRPS) technique. **(D)** Quantification of EVs produced by i-MG (i-EVs) and IL-4 MG (IL-4 EVs) upon ATP stimulation. Data are expressed as mean  $\pm$  SE.
